# Supplementary material
Source: ML conference proceedings conference paper supplement (https://openreview.net/forum?id=TO84NnDMMA)

case (a)

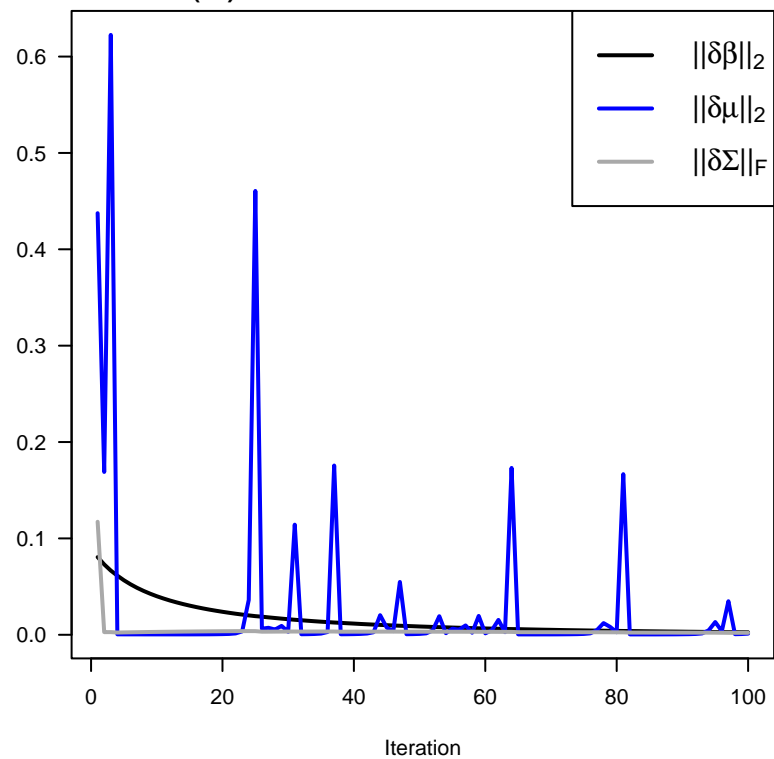

case (b)

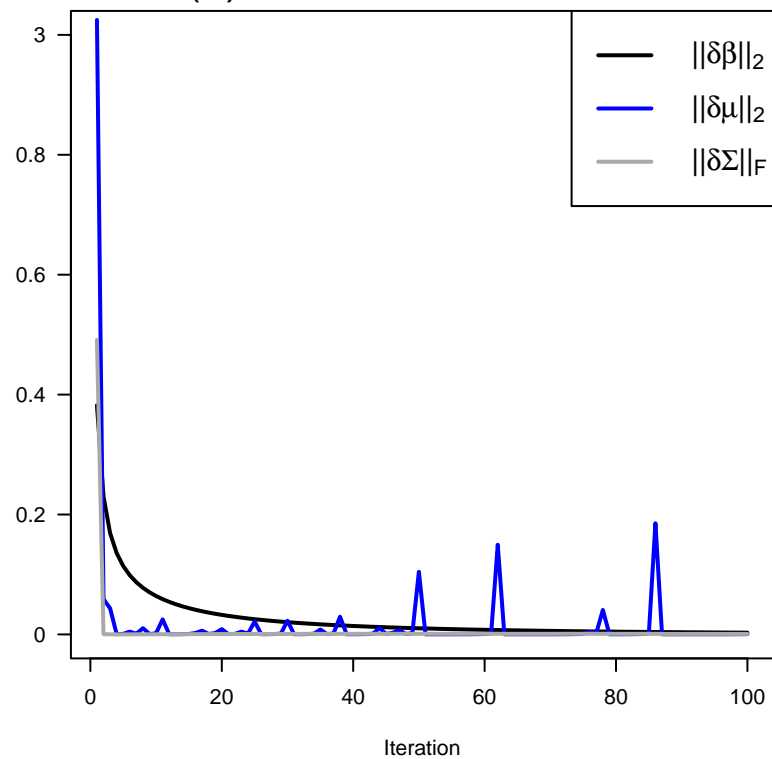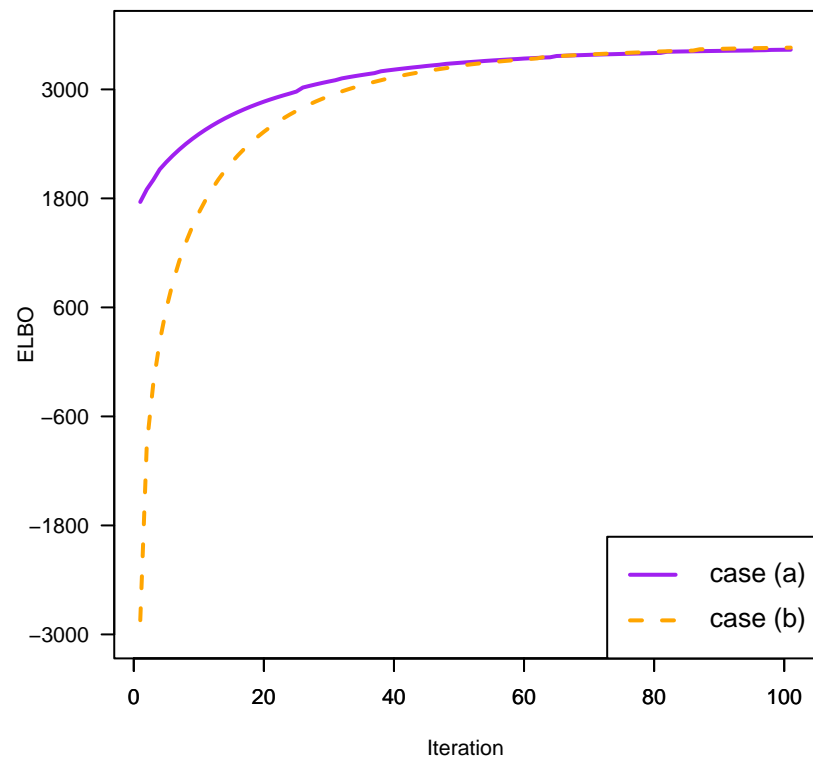

Supplement: supplementary_material [file convergence_plot.pdf › Supplementary_Material_12377/simulation/fig/convergence_plot.pdf]

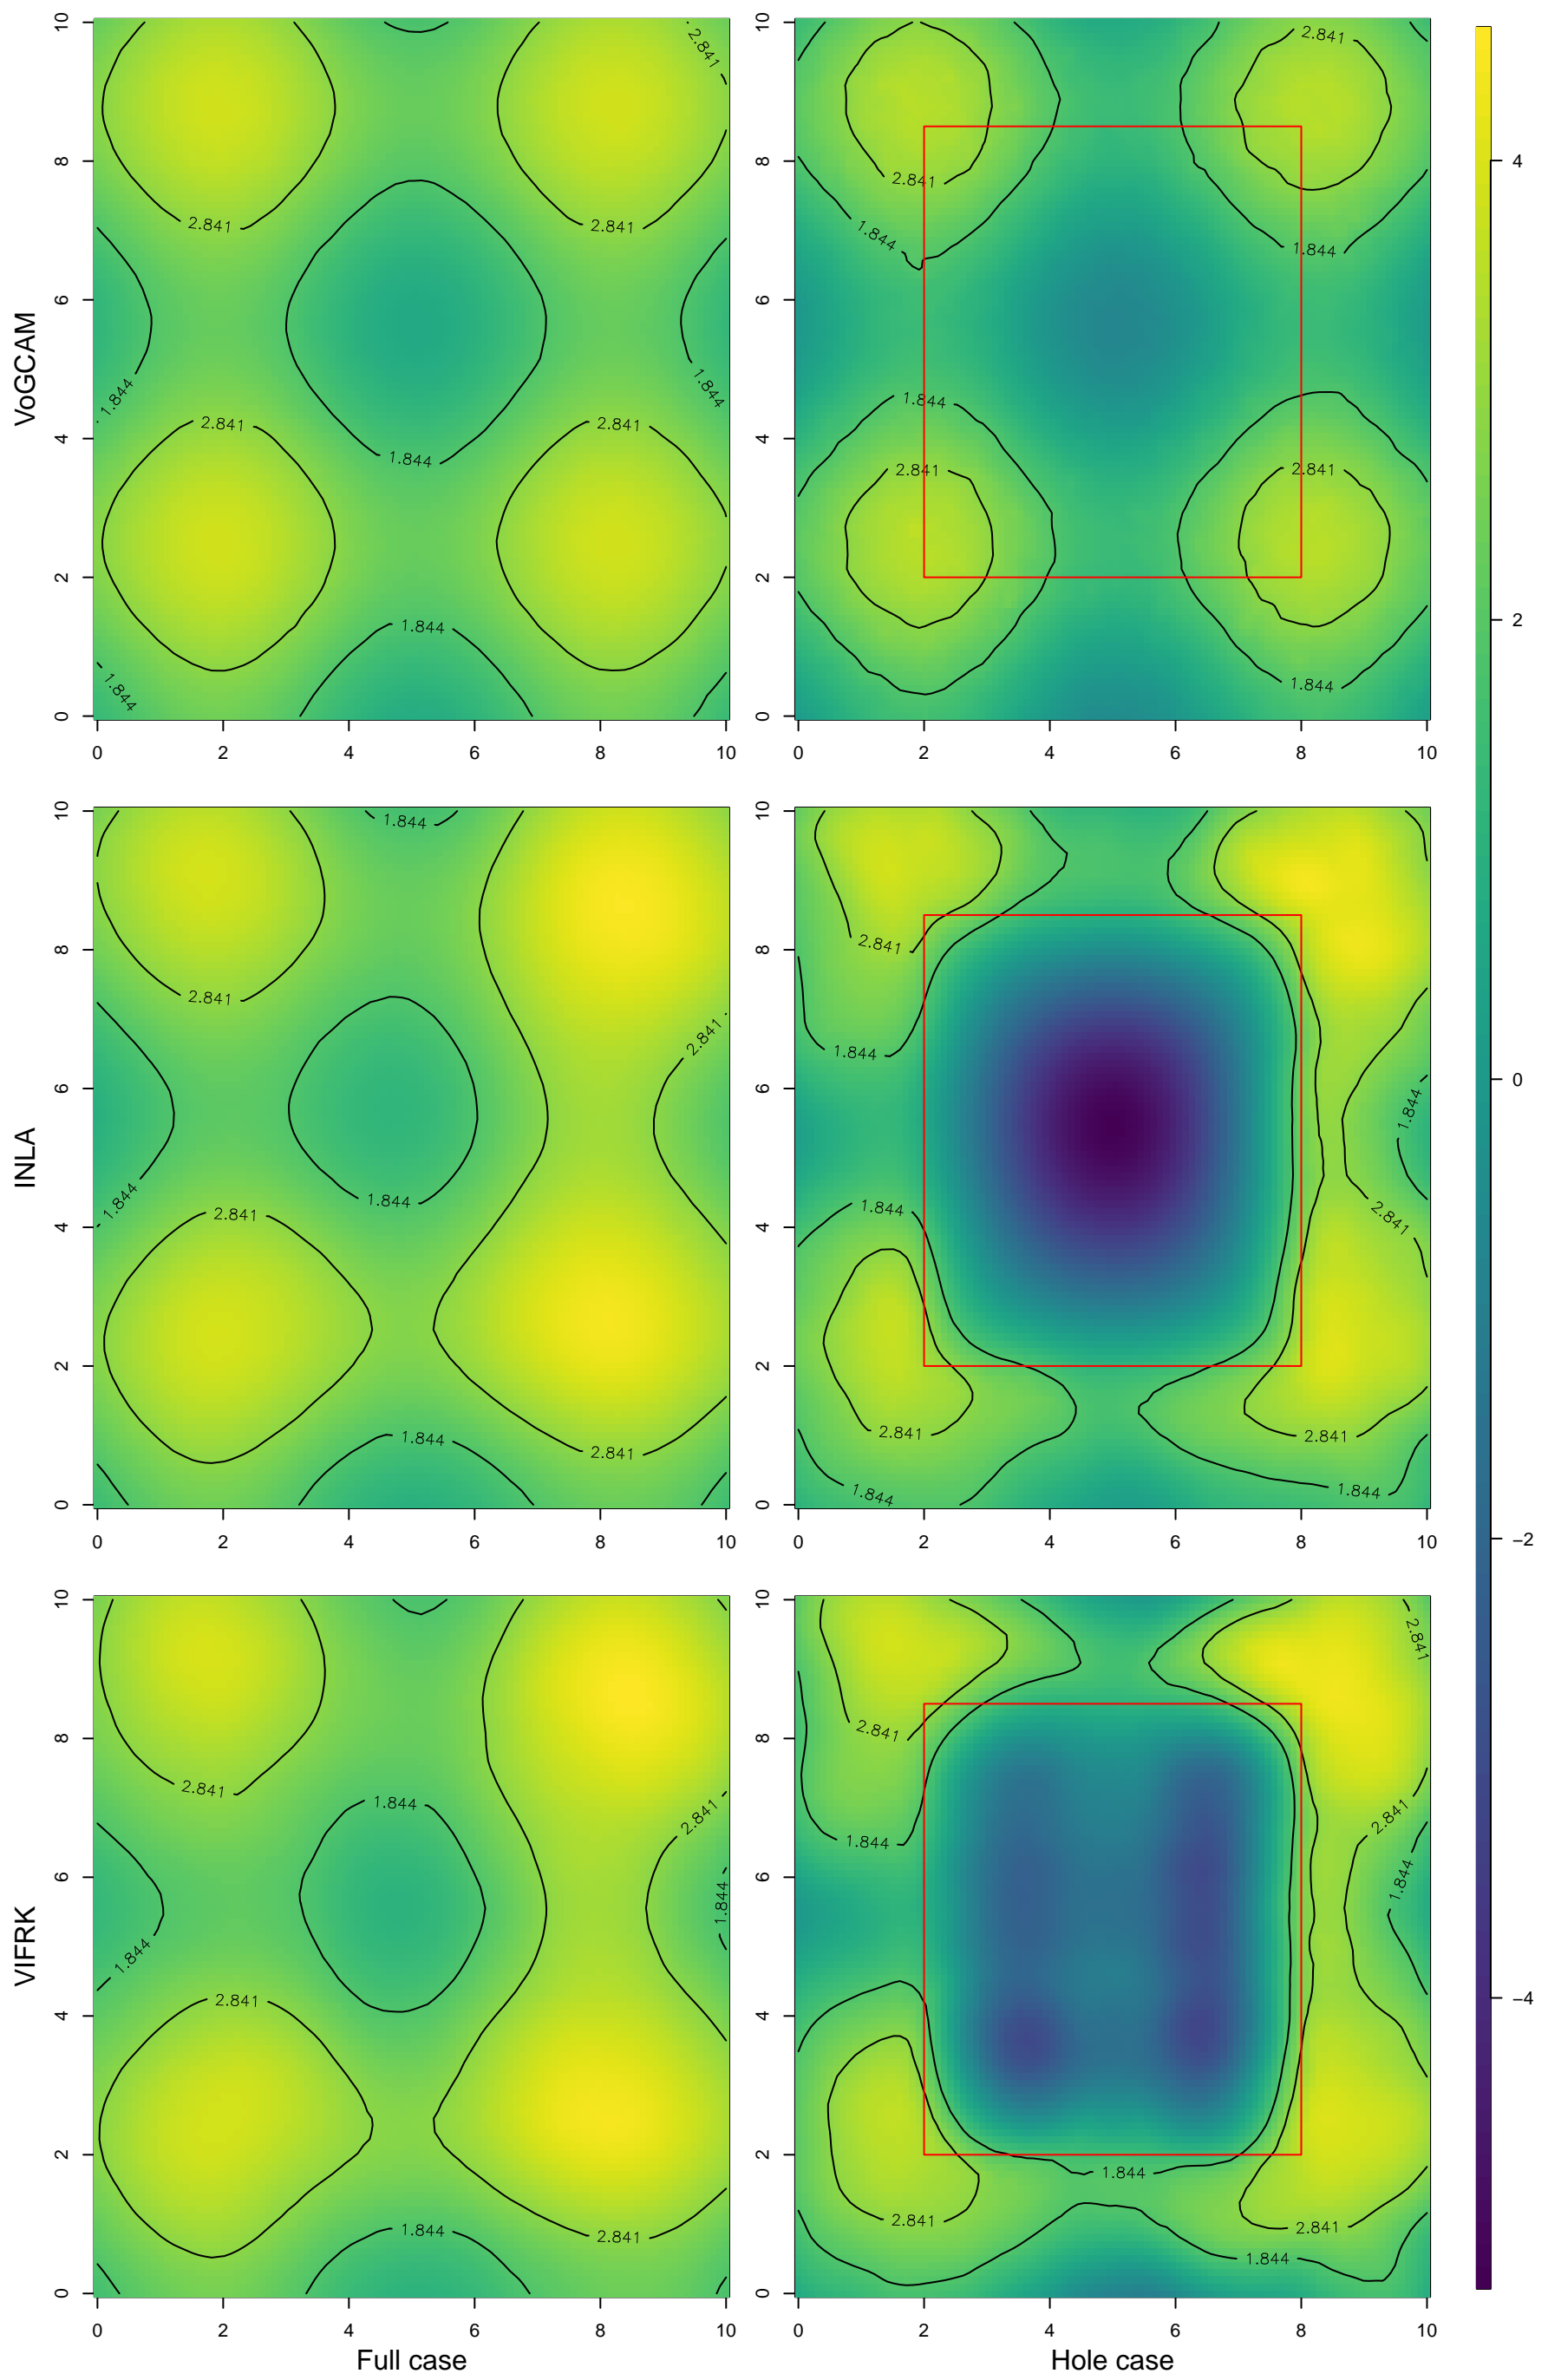

Supplement: supplementary_material [file model_comparsion_posterior_mean.pdf › Supplementary_Material_12377/simulation/fig/model_comparsion_posterior_mean.pdf]

VoGCAM

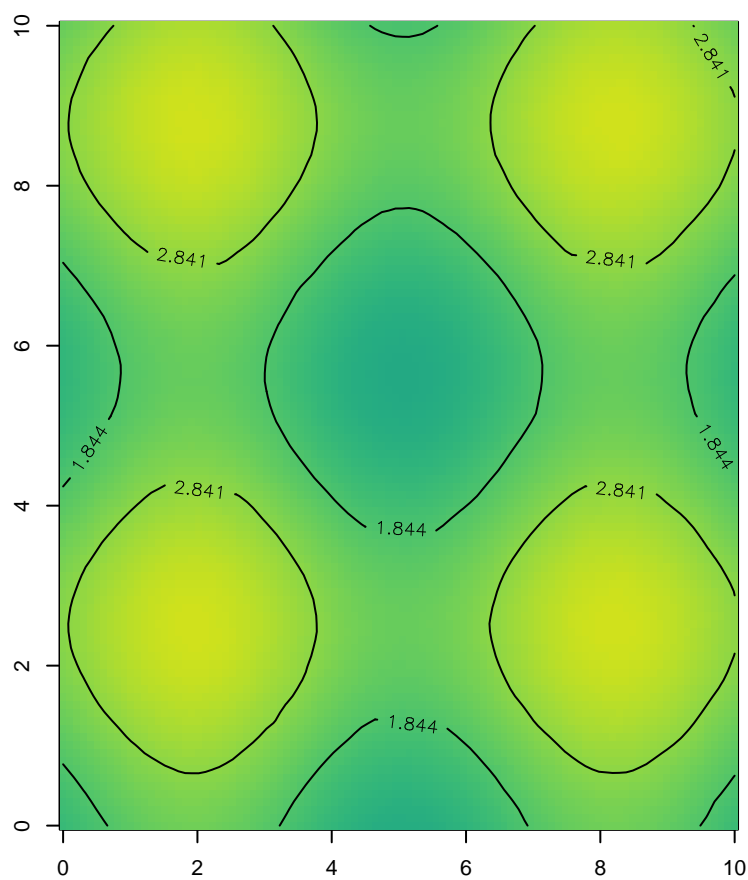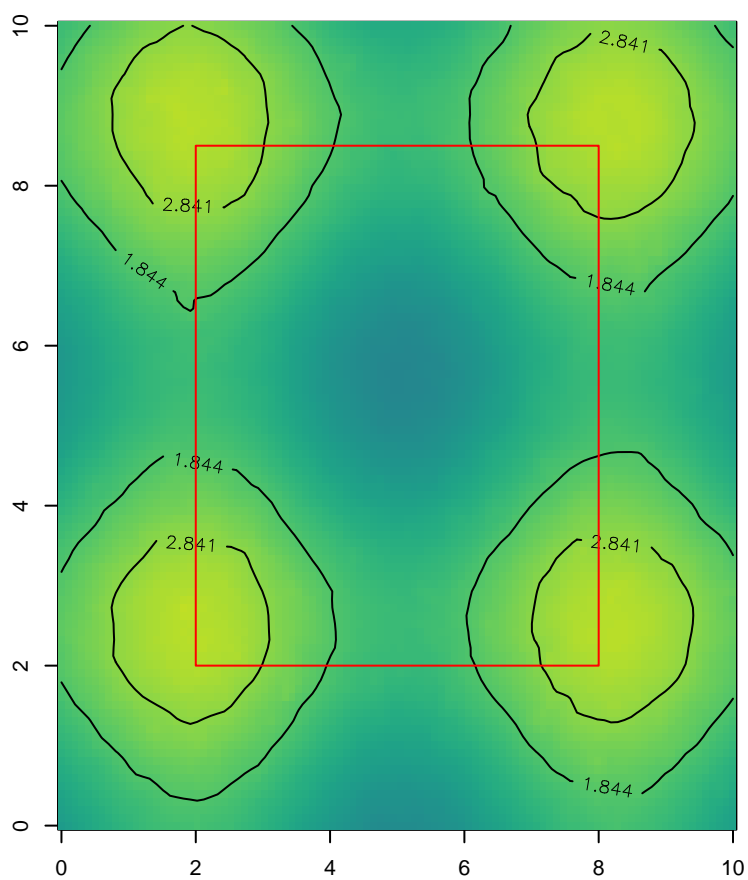

INLA

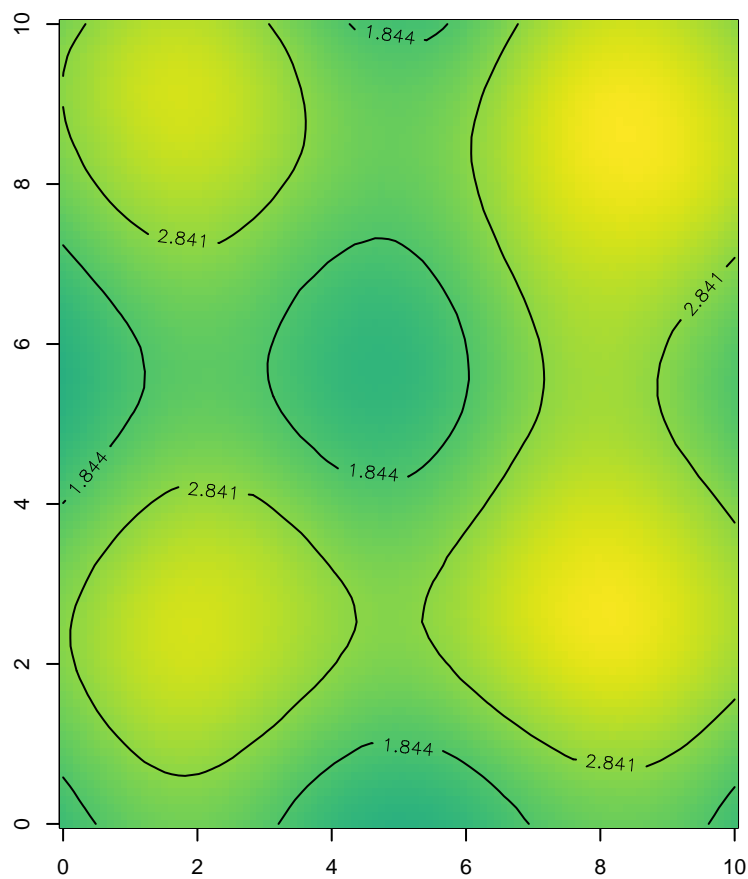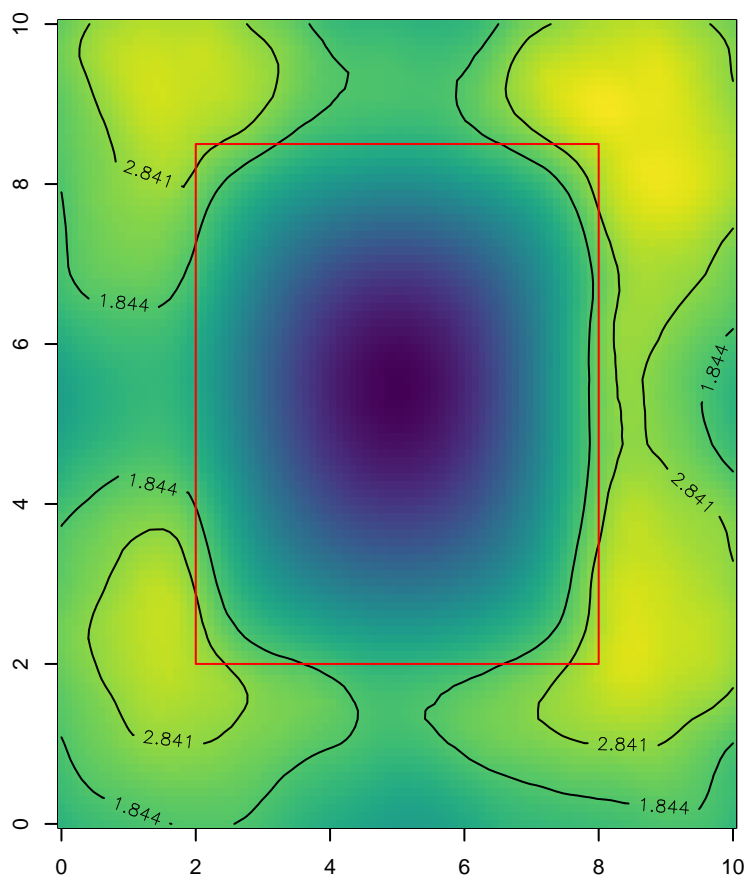

VIFRK

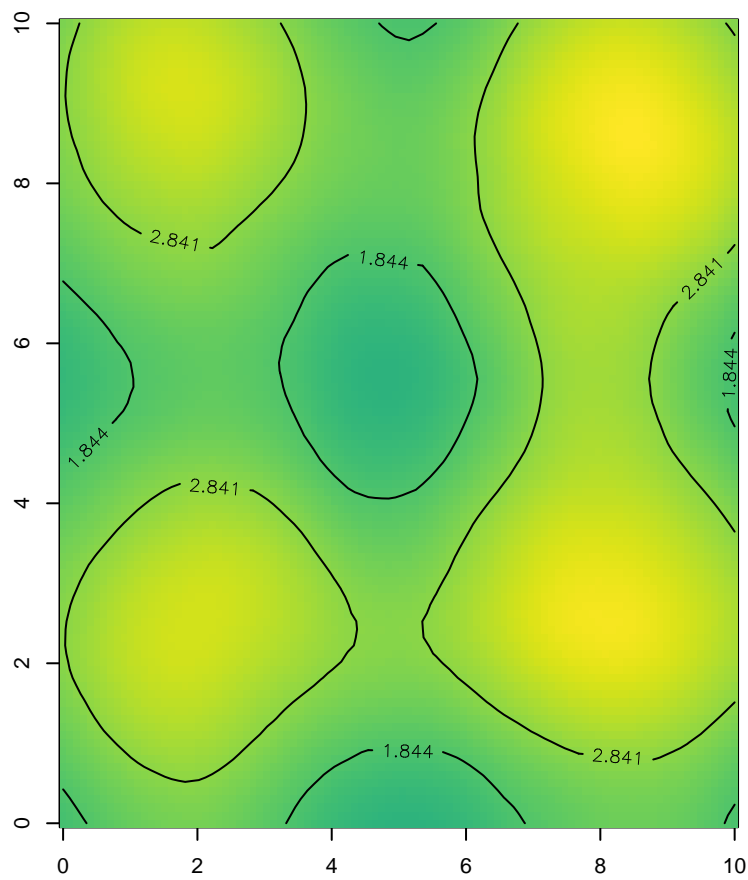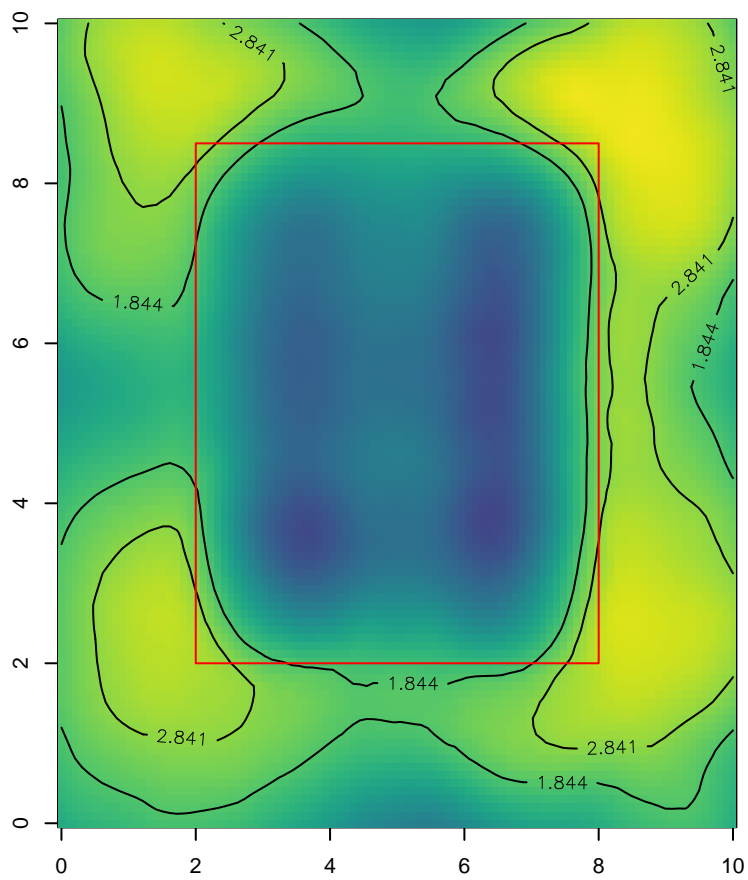

Full case

Hole case

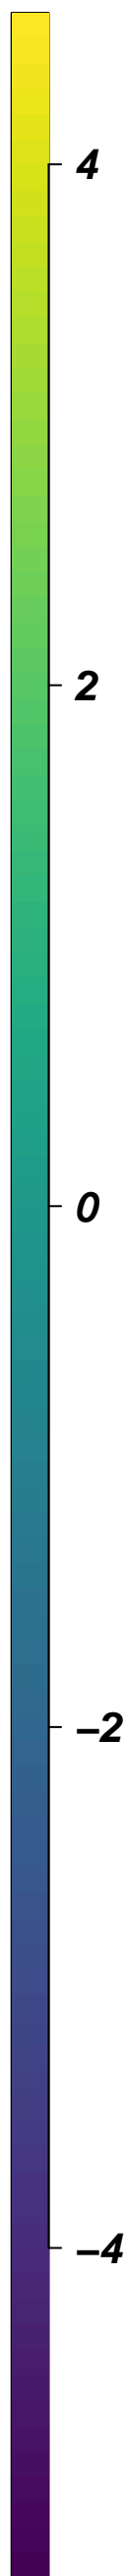

Supplement: supplementary_material [file model_comparsion_posterior_mean1.pdf › Supplementary_Material_12377/simulation/fig/model_comparsion_posterior_mean1.pdf]

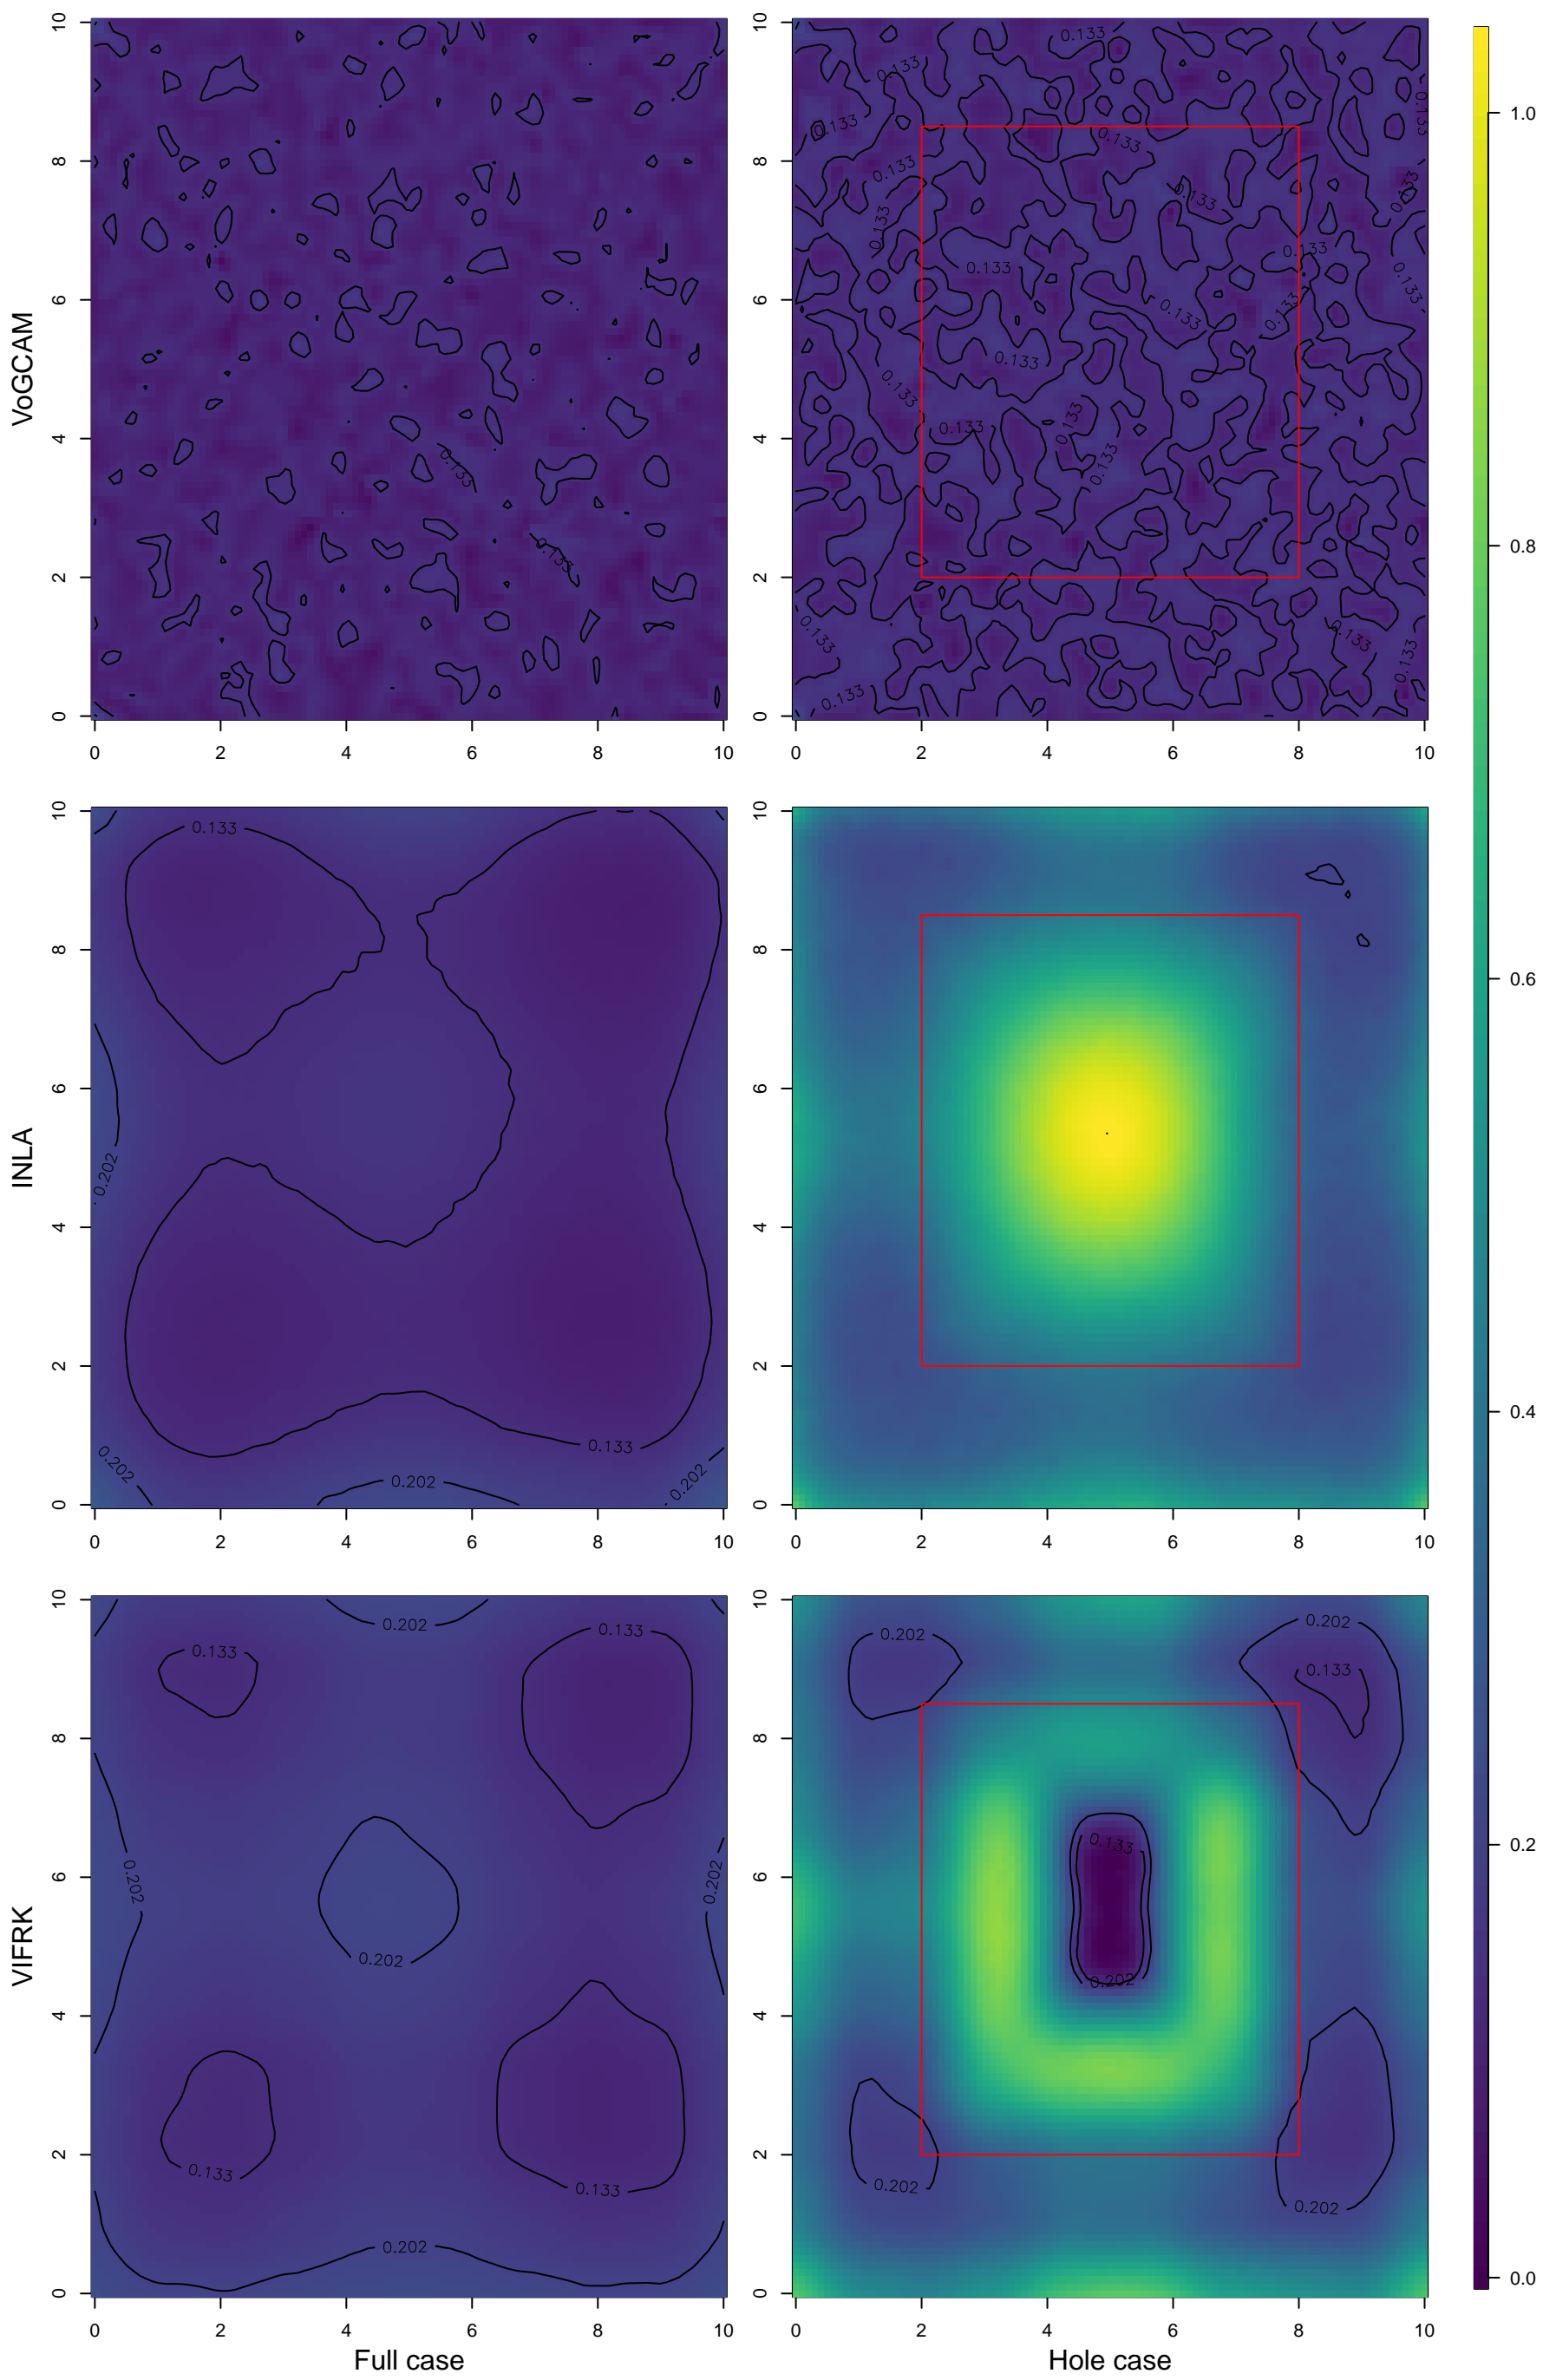

Supplement: supplementary_material [file model_comparsion_posterior_sd.pdf › Supplementary_Material_12377/simulation/fig/model_comparsion_posterior_sd.pdf]

VoGCAM

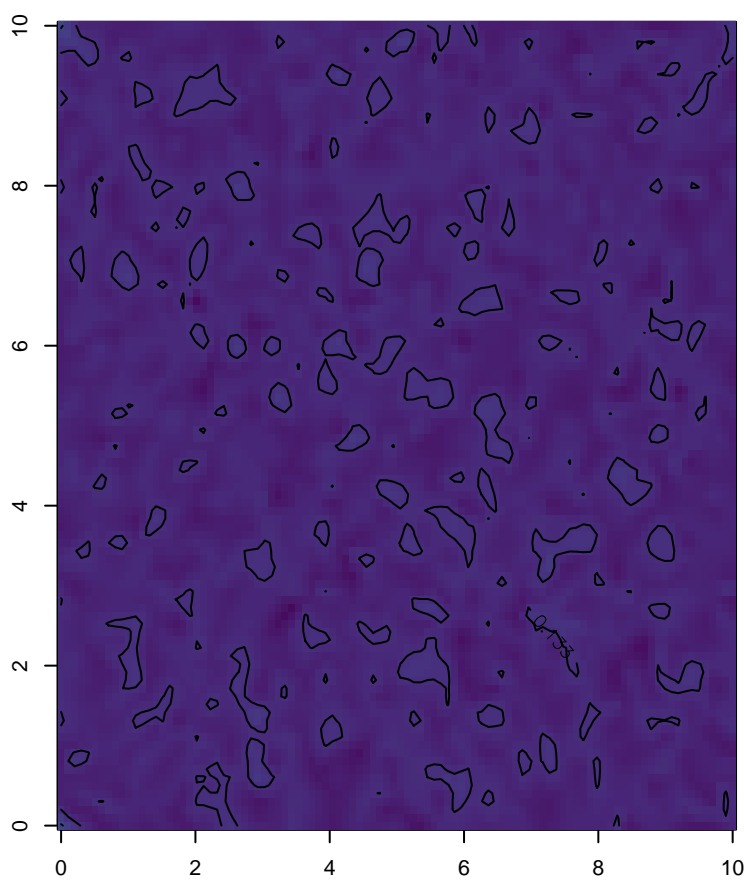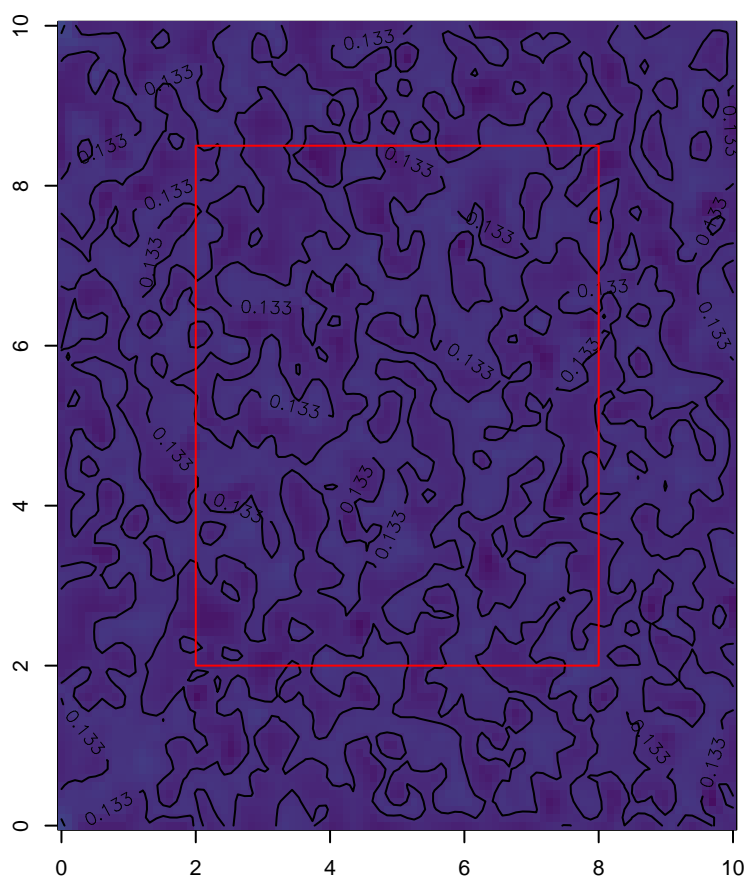

INLA

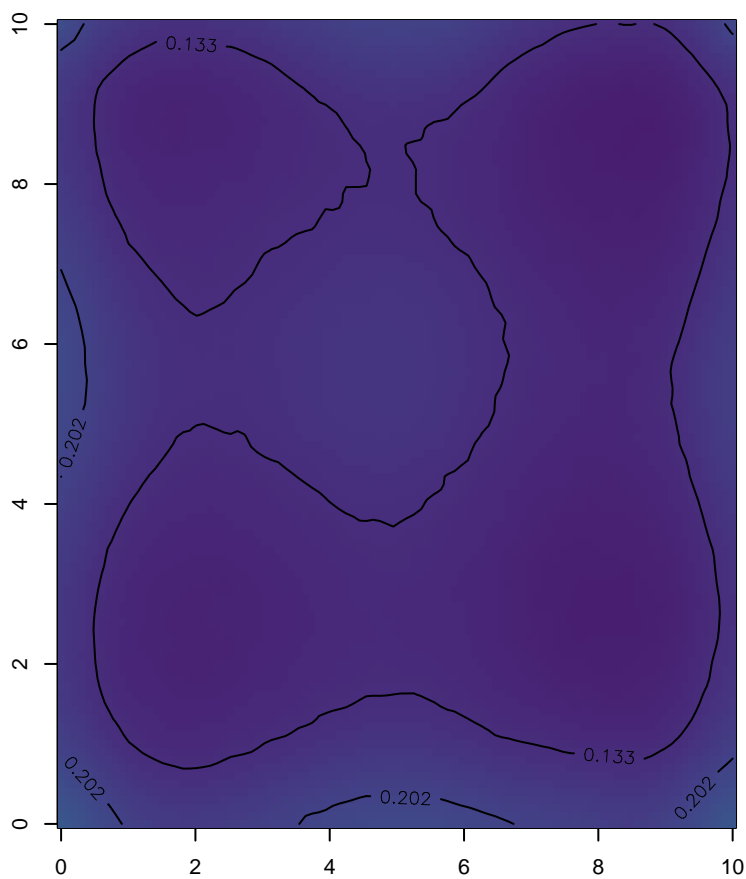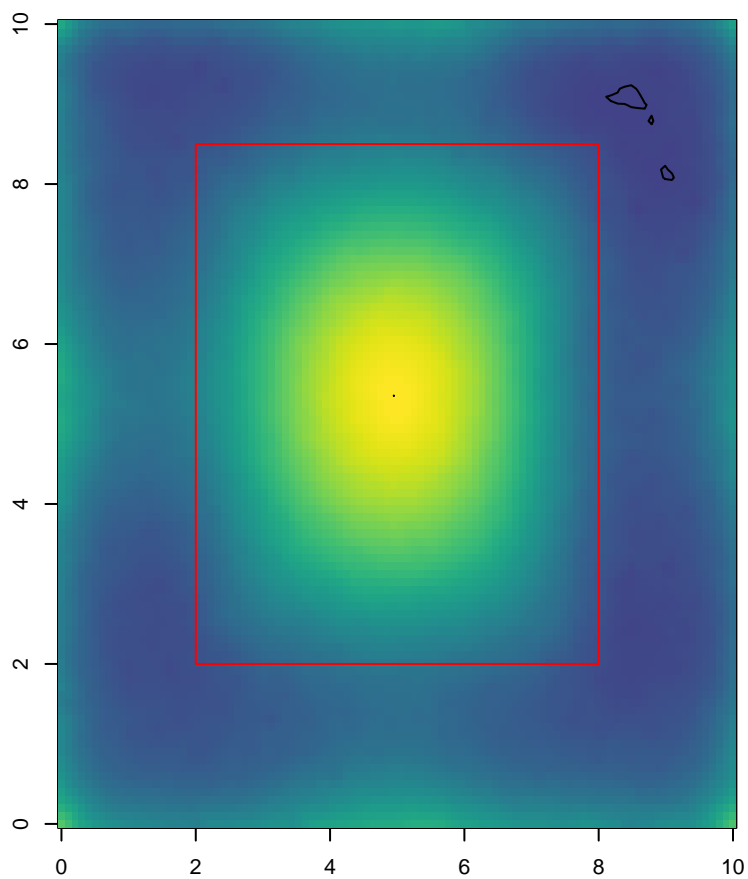

VIFRK

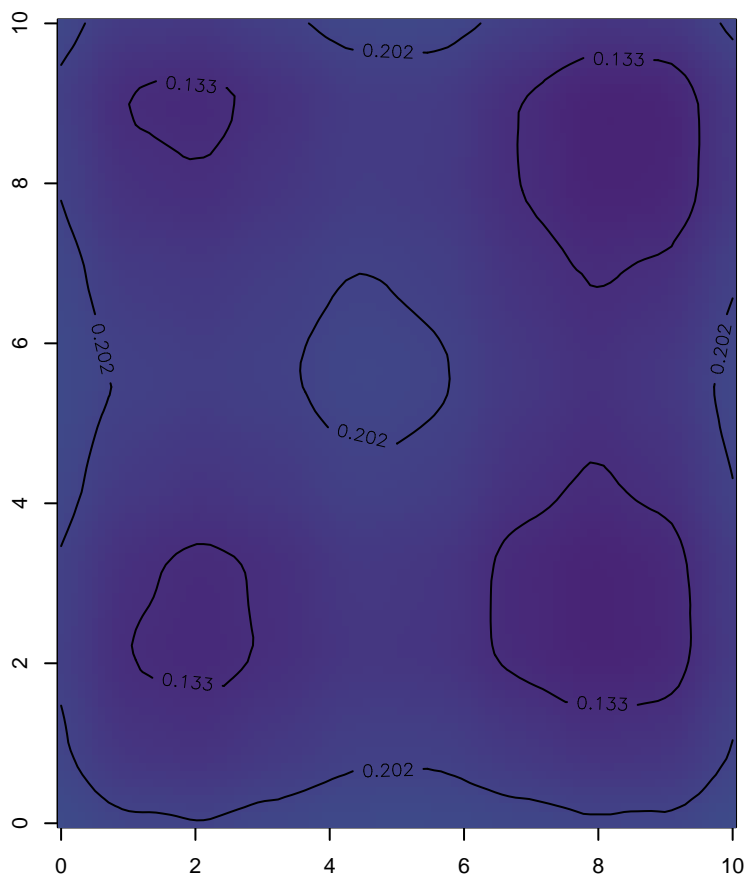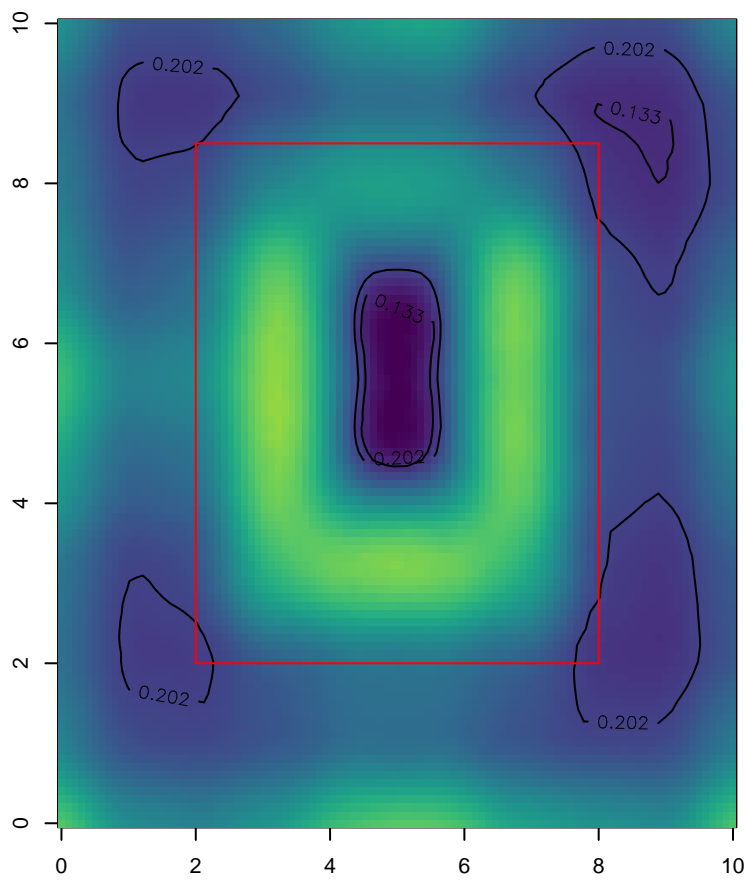

Full case

Hole case

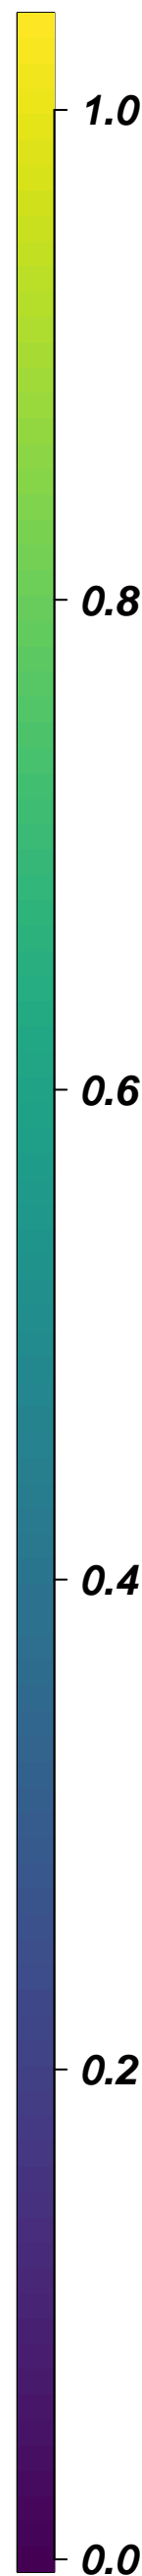

Supplement: supplementary_material [file model_comparsion_posterior_sd1.pdf › Supplementary_Material_12377/simulation/fig/model_comparsion_posterior_sd1.pdf]

(a)

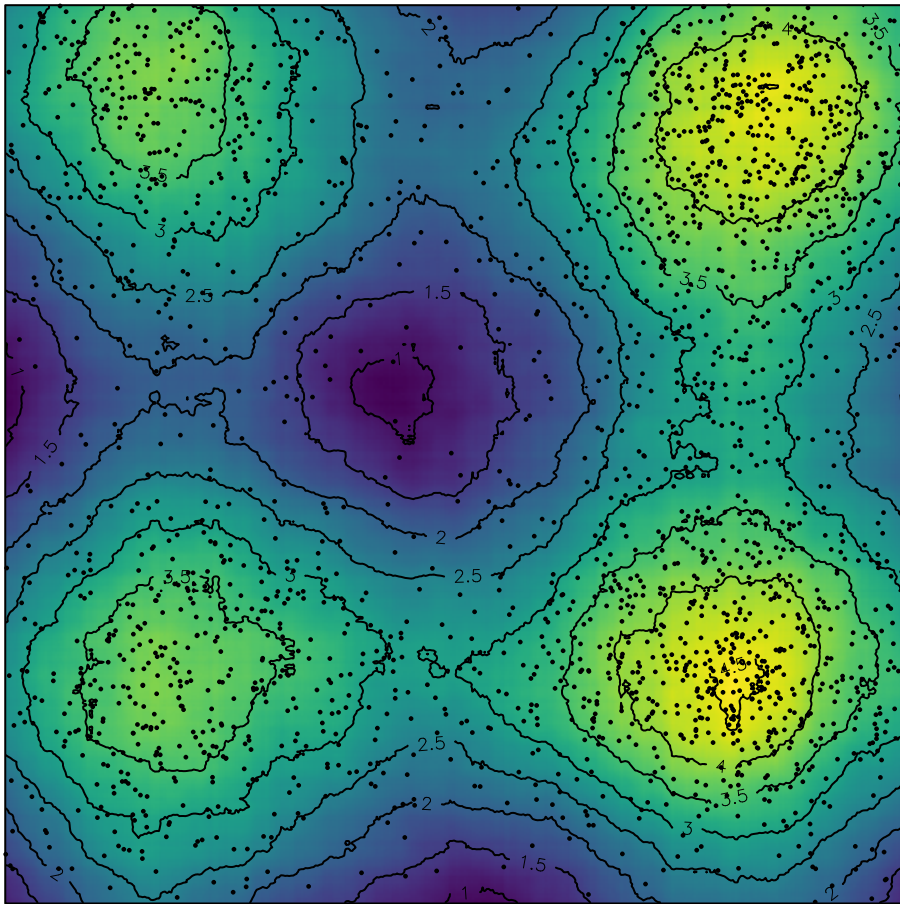

Point pattern and log-intensity surface

(b)

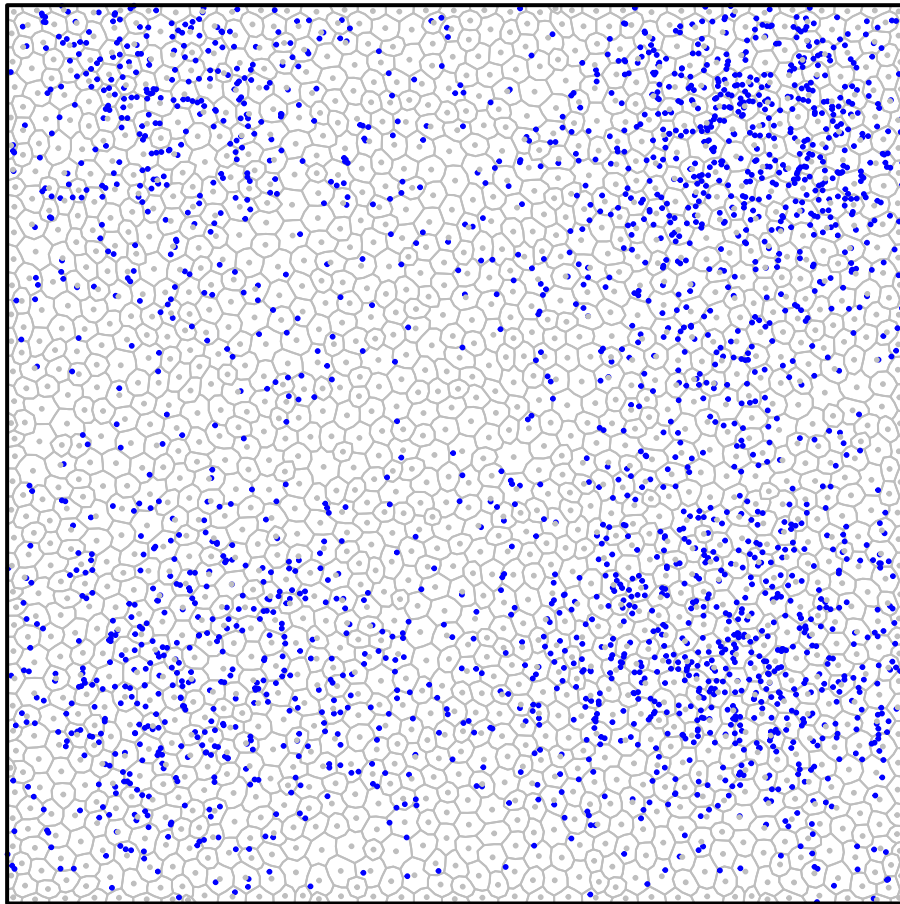

Full case

(c)

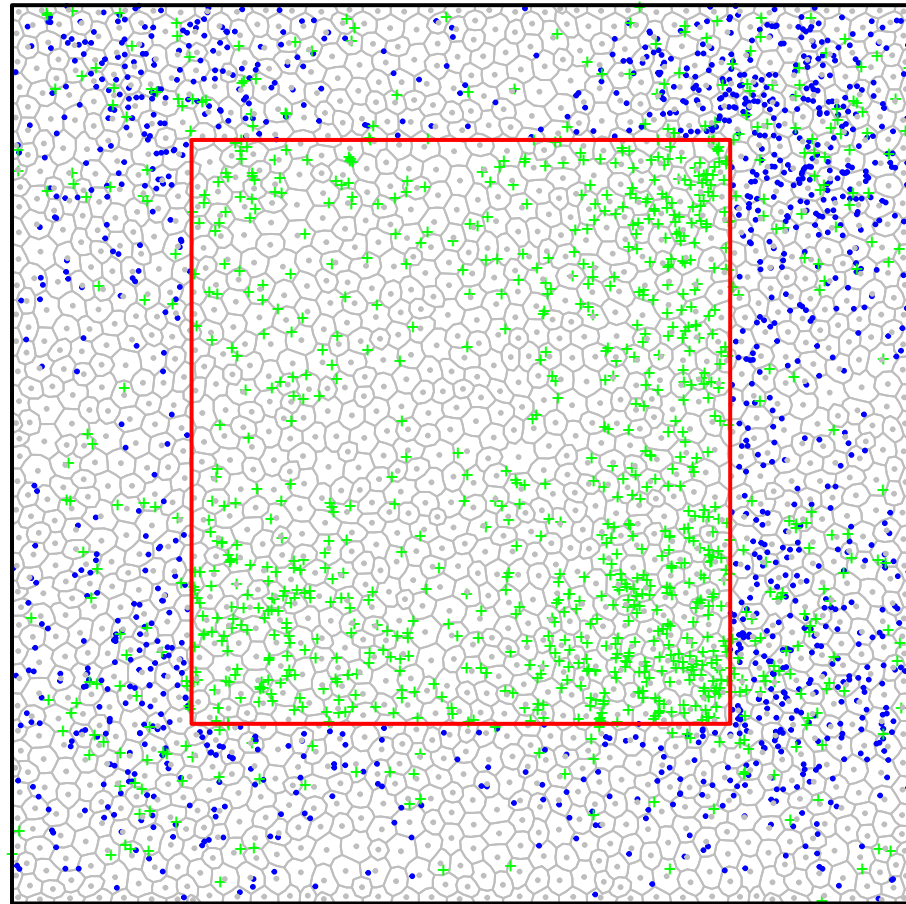

Hole case

Supplement: supplementary_material [file simulation plot.pdf › Supplementary_Material_12377/simulation/fig/simulation plot.pdf]
